# Supplementary material
Source: HighWire-hosted journal article supplement (https://heart.bmj.com/content/105/21/1642)
Supplement: inline-supplementary-material-1 [file inline-supplementary-material-1.docx]

**Figure A1.** Recruitment Flow Chart
